# Supplementary material
Source: Springer Nature journal article supplement (https://www.springermedizin.de/resource/supplementary/12914_2009_78_MOESM2_ESM.pdf/9537466)
Supplement: MOESM2 [file 9537466]

ART provision

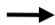

**INCREASED PUBLIC  
PROFILE OF PLHA**  
(ART clinic, post-test clubs,  
media)

*"I am not the only one"*

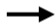

**PHYSICAL  
RECOVERY**  
(Returning to productive  
activities)

*"It has become the  
same as fever"*

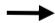

**INCREASED SOCIAL  
SUPPORT**  
(Health providers, family  
members)

*"this is like the service  
of diabetes"*

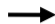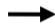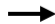

Normalisation of HIV
